# Supplementary material
Source: MDPI journal article supplement (https://www.mdpi.com/2624-862X/5/2/22)
Supplement: s1 [file s1]

Archive with 2 entries (2 files):
- Supplementary material (analytical methods).pdf
- Supplementary material (Table S1 - S9).xlsx
