# Supplementary material
Source: MDPI journal article supplement (https://www.mdpi.com/2624-862X/5/2/22)
Supplement: s1 [file s1 › Supplementary material (Table S1 - S9).xlsx]

## Sheet: Table S1
Table S1: pH and proximal composition of Wagashi Gassirè sold in the southern Benin markets
Samples number	Type of WG	pH	Moisture (%)	Protein (% wet weight)	Fat (% wet weight)
1	RWG	6.0725	52.3955	13.7016	25.9274
2	RWG	5.925	63.2953	12.2268	19.1238
3	RWG	5.89667	59.0409	15.357	24.7164
4	RWG	5.32	60.48	14.3457	22.0989
5	RWG	5.2525	56.4885	13.1295	21.9676
6	RWG	5.495	62.8028	14.3229	20.32
7	RWG	5.6825	60.4732	15.1684	17.2571
8	RWG	5.7075	57.6263	14.3245	19.6874
9	RWG	5.445	59.1175	14.2512	20.2848
10	WWG	5.545	58.222	11.3232	20.8823
11	WWG	5.20333	60.8095	13.9713	19.8634
12	WWG	5.21	61.2859	13.5565	19.8416
13	WWG	5.09833	61.907	10.8223	18.5738
14	WWG	5.03667	55.6309	13.0771	23.2211
15	WWG	5.045	57.4742	14.2347	21.6915
	Mean	5.46233	59.1366	13.5875	21.0305
	SD	0.335377	2.92838	1.29297	2.30516
RWG: Red Wagashi Gassirè, WWG: White Wagashi Gassirè

## Sheet: Table S2
Table S2: Fatty acids composition of Wagashi Gassirè sold in the southern Benin markets (g/100 g total fatty acids)
Samples ID	Type of WG	Fatty acids
		Capric acid	Lauric acid	Tridecanoic acid	Myristic acid	Palmitic acid	Heptadecanoic acid	Stearic acid	Arachidic acid	Behenic acid	Lignoceric acid	Palmitoleic acid	cis-10-heptadecenoic acid	Elaidic acid	Oleic acid	Linoleic acid	Linolelaidic acid	Rumenic acid	Isolinoleic acid	Gama-Linoleic acid	cis-11,14-Eicosadienoic acid	Arachidic acid	Alpha-Linoleic acid	Stearidonic acid	Eicosatrienoic acid	Timmodonic acid	Cupladonic acid	Cervonic acid	SFA	MUFA	PUFA	PUFA/SFA	w6	w3
		C10:0	C12:0	C13:0	C14:0	C16:0	C17:0	C18:0	C20:0	C22:0	C24:0	C16:1	C17:1	C18:1,9t	C18:1,9c	C18:2,9c,12c	C18:2,9t,12t	C18:2,9c,11t	C18:2,9t,11t	C18:3	C20:2	C20:4	C18:3	C18:4	C20:3	C20:5	C22:5	C22:6
1	RWG	1.77461	1.47761	<LOQ	7.3288	29.3678	<LOQ	17.5127	<LOQ	<LOQ	<LOQ	1.90615	<LOQ	<LOQ	38.7292	1.90313	<LOQ	<LOQ	<LOQ	<LOQ	<LOQ	<LOQ	<LOQ	<LOQ	<LOQ	<LOQ	<LOQ	<LOQ	57.4615	40.6353	1.90313	0.0331201	1.90313	0
2	RWG	<LOQ	1.564	<LOQ	8.16801	30.2856	<LOQ	17.5004	<LOQ	<LOQ	<LOQ	3.32528	1.07683	<LOQ	35.3754	2.70447	<LOQ	<LOQ	<LOQ	<LOQ	<LOQ	<LOQ	<LOQ	<LOQ	<LOQ	<LOQ	<LOQ	<LOQ	57.518	39.7775	2.70447	0.0470195	2.70447	0
3	RWG	2.17449	1.96575	<LOQ	8.11392	30.6749	<LOQ	19.9653	<LOQ	<LOQ	0.714274	0.923174	<LOQ	<LOQ	32.2414	3.22682	<LOQ	<LOQ	<LOQ	<LOQ	<LOQ	<LOQ	<LOQ	<LOQ	<LOQ	<LOQ	<LOQ	<LOQ	63.6086	33.1646	3.22682	0.0507293	3.22682	0
4	RWG	2.53636	1.74549	<LOQ	8.33209	35.6737	<LOQ	16.7141	<LOQ	<LOQ	1.00363	2.76698	<LOQ	<LOQ	28.9181	2.30955	<LOQ	<LOQ	<LOQ	<LOQ	<LOQ	<LOQ	<LOQ	<LOQ	<LOQ	<LOQ	<LOQ	<LOQ	66.0053	31.6851	2.30955	0.0349903	2.30955	0
5	RWG	2.08014	1.70459	<LOQ	7.85229	31.7771	<LOQ	18.9831	<LOQ	<LOQ	<LOQ	3.62621	<LOQ	<LOQ	31.4705	2.50616	<LOQ	<LOQ	<LOQ	<LOQ	<LOQ	<LOQ	<LOQ	<LOQ	<LOQ	<LOQ	<LOQ	<LOQ	62.3971	35.0967	2.50616	0.0401647	2.50616	0
6	RWG	2.28835	1.67974	<LOQ	7.38604	28.2415	<LOQ	16.8702	<LOQ	<LOQ	<LOQ	1.41608	14.4788	<LOQ	25.5348	2.10447	<LOQ	<LOQ	<LOQ	<LOQ	<LOQ	<LOQ	<LOQ	<LOQ	<LOQ	<LOQ	<LOQ	<LOQ	56.4659	41.4297	2.10447	0.0372697	2.10447	0
7	RWG	3.17158	2.38089	<LOQ	9.74632	34.0096	<LOQ	16.371	<LOQ	<LOQ	<LOQ	2.47937	<LOQ	<LOQ	29.0351	2.80614	<LOQ	<LOQ	<LOQ	<LOQ	<LOQ	<LOQ	<LOQ	<LOQ	<LOQ	<LOQ	<LOQ	<LOQ	65.6793	31.5145	2.80614	0.0427249	2.80614	0
8	RWG	2.00392	1.78675	<LOQ	8.93688	31.2075	<LOQ	16.4461	<LOQ	<LOQ	<LOQ	3.70551	0.854728	<LOQ	32.5995	2.45919	<LOQ	<LOQ	<LOQ	<LOQ	<LOQ	<LOQ	<LOQ	<LOQ	<LOQ	<LOQ	<LOQ	<LOQ	60.3811	37.1597	2.45919	0.0407278	2.45919	0
9	RWG	2.56474	1.90355	<LOQ	8.43171	31.4623	<LOQ	18.4273	<LOQ	<LOQ	1.12132	1.45966	<LOQ	<LOQ	31.8887	2.74076	<LOQ	<LOQ	<LOQ	<LOQ	<LOQ	<LOQ	<LOQ	<LOQ	<LOQ	<LOQ	<LOQ	<LOQ	63.9109	33.3484	2.74076	0.0428841	2.74076	0
10	WWG	3.72739	2.74182	<LOQ	9.32365	33.5978	<LOQ	16.818	<LOQ	<LOQ	<LOQ	2.47896	<LOQ	<LOQ	28.8658	2.44665	<LOQ	<LOQ	<LOQ	<LOQ	<LOQ	<LOQ	<LOQ	<LOQ	<LOQ	<LOQ	<LOQ	<LOQ	66.2086	31.3447	2.44665	0.0369537	2.44665	0
11	WWG	2.7613	2.32888	<LOQ	9.48834	32.5893	<LOQ	19.9089	<LOQ	<LOQ	<LOQ	1.94199	<LOQ	<LOQ	28.4786	2.50265	<LOQ	<LOQ	<LOQ	<LOQ	<LOQ	<LOQ	<LOQ	<LOQ	<LOQ	<LOQ	<LOQ	<LOQ	67.0767	30.4206	2.50265	0.0373103	2.50265	0
12	WWG	1.88418	1.9522	<LOQ	9.03541	32.5203	<LOQ	17.3624	<LOQ	<LOQ	<LOQ	1.68492	<LOQ	<LOQ	33.4508	2.10969	<LOQ	<LOQ	<LOQ	<LOQ	<LOQ	<LOQ	<LOQ	<LOQ	<LOQ	<LOQ	<LOQ	<LOQ	62.7546	35.1357	2.10969	0.0336181	2.10969	0
13	WWG	<LOQ	1.98734	<LOQ	8.99429	31.7616	<LOQ	18.1162	<LOQ	<LOQ	<LOQ	1.27503	<LOQ	<LOQ	35.2241	2.64142	<LOQ	<LOQ	<LOQ	<LOQ	<LOQ	<LOQ	<LOQ	<LOQ	<LOQ	<LOQ	<LOQ	<LOQ	60.8594	36.4992	2.64142	0.0434019	2.64142	0
14	WWG	2.16797	1.70557	<LOQ	7.96865	28.7636	<LOQ	20.5351	<LOQ	<LOQ	<LOQ	1.00323	<LOQ	<LOQ	35.2129	2.64291	<LOQ	<LOQ	<LOQ	<LOQ	<LOQ	<LOQ	<LOQ	<LOQ	<LOQ	<LOQ	<LOQ	<LOQ	61.141	36.2161	2.64291	0.0432266	2.64291	0
15	WWG	1.89474	1.61768	<LOQ	7.90368	33.5983	<LOQ	18.175	<LOQ	<LOQ	1.00659	1.76701	<LOQ	<LOQ	31.5616	2.4755	<LOQ	<LOQ	<LOQ	<LOQ	<LOQ	<LOQ	<LOQ	<LOQ	<LOQ	<LOQ	<LOQ	<LOQ	64.1959	33.3286	2.4755	0.0385616	2.4755	0
RWG: Red Wagashi Gassirè, WWG: White Wagashi Gassirè, SFA: Saturated Fatty acids, MUFA: Monounsaturated Fatty acids, PUFA: Polyunsaturated Fatty acids, LOQ = 0,1 g/100g g total fatty acids

## Sheet: Table S3
Table S3: Essential minerals composition of Wagashi Gassirè sold in the southern Benin markets (mg/kg wet weight)
Samples number	Type of WG	Na	Mg	P	K	Ca	Fe	Mn	Cu	Zn	Se	Mo
	LOQ	5	1.2	1.9	2.3	4.2	0.5	0.01	0.3	0.3	0.09	0.004
1	RWG	28.382	68.8557	2111.44	16.0251	2401.11	7.14291	1.09584	0.465556	29.1546	<LOQ	0.0175089
2	RWG	28.5443	34.6539	1211.36	12.3536	866.118	2.36635	0.30845	0.377423	16.8015	<LOQ	0.0189826
3	RWG	29.0381	35.5436	1272.12	13.7952	997.328	4.19318	0.606469	0.720124	20.694	<LOQ	0.014538
4	RWG	26.6401	29.7192	1279.78	10.6958	729.15	3.24846	0.416282	0.67516	15.4487	<LOQ	0.0344442
5	RWG	26.315	52.1813	1470.46	10.3269	1460.08	8.88403	0.716066	1.24949	24.0286	<LOQ	0.0360079
6	RWG	24.9549	51.72	1553.97	10.9936	1451.8	4.3432	0.431233	0.699789	19.5418	<LOQ	0.022657
7	RWG	51.3415	71.6929	2075.71	26.8863	2374.65	7.22399	1.14848	0.858045	25.3846	<LOQ	0.0177539
8	RWG	54.0493	61.5439	2116.56	38.1694	2351.86	7.02009	1.18512	0.838843	24.4278	<LOQ	0.014484
9	RWG	45.9099	32.8015	1320.7	20.9513	1107.47	4.25369	0.4005	0.82974	19.0692	0.103288	0.0131401
10	WWG	22.1715	62.1394	1686.45	40.983	1805.93	10.3841	0.54186	1.15641	18.0067	<LOQ	0.018908
11	WWG	32.5534	82.0283	2156.65	53.8499	2666.58	1.64647	0.270527	0.780476	20.9841	<LOQ	0.0127052
12	WWG	25.9011	81.8366	2019.86	45.6817	2227.89	3.93738	0.405582	0.681178	18.7469	<LOQ	0.0196251
13	WWG	175.674	216.938	2901.71	270.647	4384.55	1.28959	0.212921	0.381563	19.7178	<LOQ	0.0338658
14	WWG	129.324	190.67	2906.54	214.272	3859.99	5.92538	0.606426	0.68431	24.8338	<LOQ	0.0357151
15	WWG	104.62	156.666	2615.78	152.056	3609.94	2.63379	0.33822	<LOQ	15.935	<LOQ	0.0166948
	Mean	53.6946	81.9327	1913.27	62.5124	2152.96	4.96617	0.578932	0.742722	20.8517	0.103288	0.021802
	SD	46.0281	58.5808	577.403	81.894	1122.51	2.6981	0.321945	0.250277	3.93465		0.00865009
RWG: Red Wagashi Gassirè, WWG: White Wagashi Gassirè

## Sheet: Table S4
Table S4: Metallic trace elements composition of Wagashi Gassirè sold in the southern Benin markets (mg/kg wet weight)
Samples number	Type of WG	Li	Al	Cr	Ni	As	Rb	Sr	Sn	Ba	Tl	Pb	Bi	U	V	Ag	B	Be	Co	Sb	Cd
	LOQ	0.006	5.2	0.01	0.02	0.01	0.006	0.03	0.009	0.01	0	0.01	0.003	0	0.005	0.007	1.7	0.03	0.01	0.05	0.003
1	RWG	<LOQ	150.691	0.0784176	<LOQ	<LOQ	0.0649522	4.21859	0.0553214	4.15969	0.000401029	0.143884	0.0036328	0.00886354	0.0550407	<LOQ	<LOQ	<LOQ	<LOQ	<LOQ	<LOQ
2	RWG	<LOQ	31.8715	<LOQ	0.0270214	0.0148996	0.045297	1.13711	<LOQ	1.02818	<LOQ	0.0799715	<LOQ	0.00376855	0.0213524	<LOQ	<LOQ	<LOQ	<LOQ	<LOQ	<LOQ
3	RWG	<LOQ	120.232	0.0218577	<LOQ	0.0181573	0.0514698	1.83675	<LOQ	2.27308	<LOQ	0.0399831	<LOQ	0.00955664	0.0485062	<LOQ	<LOQ	<LOQ	<LOQ	<LOQ	<LOQ
4	RWG	<LOQ	0	<LOQ	<LOQ	0.0218769	0.032649	0.993443	<LOQ	0.848806	<LOQ	0.0232631	<LOQ	0.00212698	0.0145346	<LOQ	<LOQ	<LOQ	<LOQ	<LOQ	<LOQ
5	RWG	<LOQ	11.1876	0.0235953	<LOQ	0.0262896	0.0382721	2.20357	<LOQ	1.64562	<LOQ	0.0479892	<LOQ	0.0109647	0.0392504	<LOQ	<LOQ	<LOQ	<LOQ	<LOQ	<LOQ
6	RWG	<LOQ	5.54312	0.0188469	<LOQ	0.0275597	0.0320512	1.67777	<LOQ	1.25284	<LOQ	0.0433198	<LOQ	0.00273507	0.0162231	<LOQ	<LOQ	<LOQ	<LOQ	<LOQ	<LOQ
7	RWG	<LOQ	179.828	0.024989	<LOQ	0.0336553	0.0739512	3.89958	<LOQ	4.43241	0.000443557	0.0542967	<LOQ	0.0101282	0.0639609	<LOQ	<LOQ	<LOQ	<LOQ	<LOQ	<LOQ
8	RWG	<LOQ	572.998	0.0334152	<LOQ	0.0235123	0.0893391	5.70001	<LOQ	5.45756	0.00124726	0.0803458	<LOQ	0.0150732	0.0760152	<LOQ	<LOQ	<LOQ	<LOQ	<LOQ	<LOQ
9	RWG	<LOQ	39.1417	<LOQ	<LOQ	0.0193609	0.0540925	1.28843	<LOQ	1.25469	0.000371126	0.0295699	<LOQ	0.00515897	0.0352181	<LOQ	<LOQ	<LOQ	<LOQ	<LOQ	<LOQ
10	WWG	<LOQ	7.81455	0.0371452	0.0451598	0.0165337	0.116593	1.8024	0.051025	1.40036	<LOQ	0.044831	<LOQ	0.000858209	0.0128279	<LOQ	<LOQ	<LOQ	<LOQ	<LOQ	<LOQ
11	WWG	<LOQ	<LOQ	0.0192862	<LOQ	0.0176418	0.170981	2.45386	<LOQ	2.74591	<LOQ	0.0307785	<LOQ	0.000454879	<LOQ	<LOQ	<LOQ	<LOQ	<LOQ	<LOQ	<LOQ
12	WWG	<LOQ	<LOQ	<LOQ	<LOQ	0.0280085	0.140037	1.76445	<LOQ	1.86252	<LOQ	0.233339	<LOQ	0.00135065	<LOQ	<LOQ	<LOQ	<LOQ	<LOQ	<LOQ	<LOQ
13	WWG	0.00928429	<LOQ	0.0149723	<LOQ	0.0241069	1.18074	2.86643	<LOQ	1.91989	<LOQ	0.118301	<LOQ	<LOQ	<LOQ	<LOQ	<LOQ	<LOQ	<LOQ	<LOQ	<LOQ
14	WWG	<LOQ	<LOQ	0.018644	<LOQ	0.0333041	1.23045	3.00839	<LOQ	2.16049	0.000502096	0.147412	<LOQ	0.00177359	0.00861492	<LOQ	<LOQ	<LOQ	<LOQ	<LOQ	<LOQ
15	WWG	<LOQ	<LOQ	<LOQ	<LOQ	0.0334227	0.675336	3.01364	<LOQ	2.41549	<LOQ	0.199442	<LOQ	0.0142967	0.00629486	<LOQ	<LOQ	<LOQ	<LOQ	<LOQ	<LOQ
RWG: Red Wagashi Gassirè, WWG: White Wagashi Gassirè

## Sheet: Table S5
Table S5: Dioxins and aflatoxin M1 contents of Wagashi Gassirè sold in the southern Benin markets
Samples number	Type of WG	Dioxins and PCBs (pg BEQ/g fat)
1	RWG	2.57281
2	RWG	2.31389
3	RWG	2.24416
4	RWG	4.34095
5	RWG	<LOQ
6	RWG	<LOQ
7	RWG	2.4612
8	RWG	<LOQ
9	RWG	<LOQ
10	WWG	<LOQ
11	WWG	1.71435
12	WWG	1.29575
13	WWG	1.87016
14	WWG	<LOQ
15	WWG	1.28331
RWG: Red Wagashi Gassirè, WWG: White Wagashi Gassirè, LOQ=0,9 pg/g fat

## Sheet: Table S6
Table S6: aflatoxin M1 contents of Wagashi Gassirè sold in the southern Benin markets
Samples number	Type of WG	AFM1 (µg/kg wet weight)
1	RWG	0.461418
2	RWG	0.231256
3	RWG	0.211371
4	RWG	0.282319
5	RWG	0.478585
6	RWG	0.272679
7	RWG	0.380288
8	RWG	0.225484
9	RWG	0.223273
10	WWG	0.216451
11	WWG	0.170993
12	WWG	0.196351
13	WWG	0.149859
14	WWG	0.142928
15	WWG	0.14629
RWG: Red Wagashi Gassirè, WWG: White Wagashi Gassirè, LOQ=0,1 µg/kg wet weight

## Sheet: Table S7
Table S7: Biogenic amines contents (mg/kg wet weight) of Wagashi Gassirè sold in the southern Benin markets												Total Biogenic amine content
Samples number	Type of WG	2-Phenylethylamine	Putrescine	Cadaverine	Histamine	Tyramine	Spermidine	Methylamine	Tryptamine	Serotonin	Spermine
1	RWG	1.76225	35.2823	109.617	12.1531	22.8453	<LOQ	<LOQ	<LOQ	<LOQ	<LOQ	182
2	RWG	<LOQ	19.1525	14.5892	<LOQ	3.87801	<LOQ	<LOQ	<LOQ	<LOQ	<LOQ	38
3	RWG	<LOQ	<LOQ	<LOQ	<LOQ	2.06631	<LOQ	<LOQ	<LOQ	<LOQ	<LOQ	2
4	RWG	<LOQ	35.7195	18.4087	<LOQ	<LOQ	1.0314	<LOQ	<LOQ	<LOQ	<LOQ	55
5	RWG	2.421	22.879	96.0625	50.1588	59.6649	<LOQ	<LOQ	<LOQ	<LOQ	<LOQ	231
6	RWG	<LOQ	<LOQ	<LOQ	<LOQ	16.9986	<LOQ	<LOQ	<LOQ	<LOQ	<LOQ	17
7	RWG	<LOQ	10.0982	29.8125	29.5255	27.1739	1.57759	<LOQ	<LOQ	<LOQ	<LOQ	99
8	RWG	2.14959	16.8497	<LOQ	49.742	48.5433	0.785396	<LOQ	<LOQ	<LOQ	<LOQ	119
9	RWG	<LOQ	<LOQ	2.50204	<LOQ	<LOQ	<LOQ	<LOQ	<LOQ	<LOQ	<LOQ	3
10	WWG	<LOQ	9.35118	<LOQ	17.1124	9.35671	1.87862	<LOQ	<LOQ	<LOQ	<LOQ	37
11	WWG	<LOQ	1.5059	12.1726	<LOQ	3.98209	<LOQ	<LOQ	<LOQ	<LOQ	<LOQ	18
12	WWG	<LOQ	<LOQ	0.932373	<LOQ	<LOQ	<LOQ	<LOQ	<LOQ	<LOQ	<LOQ	1
13	WWG	<LOQ	<LOQ	2.27362	<LOQ	3.61392	1.32541	<LOQ	<LOQ	<LOQ	<LOQ	7
14	WWG	<LOQ	<LOQ	<LOQ	<LOQ	11.4758	<LOQ	<LOQ	<LOQ	<LOQ	<LOQ	11
15	WWG	<LOQ	<LOQ	1.19921	<LOQ	<LOQ	<LOQ	<LOQ	<LOQ	<LOQ	<LOQ	1
RWG: Red Wagashi Gassirè, WWG: White Wagashi Gassirè, LOQ= 0,4 mg/kg mg/kg wet weight

## Sheet: Table S8
	Tables S7: Screening of antibiotic residues in Wagashi Gassirè sold in the southern Benin markets
	Samples number	Type of WG	BeadyPlex
	1	RWG	Negative
	2	RWG	Quinolones
	3	RWG	Quinolones
	4	RWG	Negative
	5	RWG	Quinolones
	6	RWG	Tetracyclines
	7	RWG	Negative
	8	RWG	Negative
	9	RWG	Quinolones
	10	WWG	Negative
	11	WWG	Negative
	12	WWG	Colistine
	13	WWG	Negative
	14	WWG	Not determined
	15	WWG	Negative
	RWG: Red Wagashi Gassirè, WWG: White Wagashi Gassirè

## Sheet: Table S9
LCMSMS			ALL LCMSMS
			LOD: 0.00125 mg/kg cheese
Classe	A		B	C		D		E		G		H
1	Acephate		Amethryn	Carbofuran		Azoxystrobine		Carbendazim		2,4-D		Atrazine
2	Acetamiprid		Boscalid	Dimethoate		Bentazon		Diazinon		Cyflufenamid		Benalaxyl
3	Difenconazole		Butachlor	Diuron		Bitertanol		Imazalil		Cypermethrin		Chlorotoluron
4	Fenpropimorf		Carbaryl	Ethoprophos		Cadusafos		Imidacloprid		Penconazole		Cyanizine
5	Methiocarb		Dimethomorph	Fenamiphos		Chlorpyrifos		Kresoxim-methyl		Pirimiphos-methyl		Epoxiconazole
6	Methomyl		Hexaconazole	Fenbuconazole		Cymoxanil		Metsulfuron-methyl		Spirodiclofen		Fenoxycarb
7	Pirimicarb		Malathion	Fludioxonil		Iprodione		Nicosulfuron		Tebufenozide		Hexythiazox
8	Prochloraz		Propoxur	Metalaxyl		Linuron		Parathion		Temephos		Isoproturon
9	Pyrimethanil		Prosulfocarb	Methribuzin		Oxamyl		Profenofos		Thiacloprid		Propazine
10	Tebuthiuron		Spinosad a	Monocrotophos		Propanil		Propiconazole				Simazine
11	Thifensulfuron-methyl		Spinosad d	Pendimehtanil		Tebuconazole		Pyrachlostrobine				Terbutylazine
12	Thiodicarb		Spiroxamine	Pyrazosulfuron-ethyl		Terbutryn		Terufos
13	Trifloxystrobine		Thiabendazole	Tirazophos		Thiofanate-methyl		Triademinol
14			Thiametoxam
GCECD			ALL GC-ECD COMPONENTS:
			LOD: 0.01125 mg/kg cheese
1	Alachlor
2	Aldrin
3	Bèta- HCH
4	Bifenthrin
5	Chlorothalonil
6	Cyhalothrin
7	Cypermethrin
8	DDD
9	DDE
10	DDT
11	Deltamethrin
12	Dieldrin
13	Endosulfan
14	Endrin
15	Heptachlor
16	Hexachlorobenzene
17	Methoxychlor
